# Supplementary material for: The role of USP7-YY1 interaction in promoting colorectal cancer growth and metastasis
Source: Springer Nature journal article supplement (doi:10.1038/s41419-024-06740-4), 2024-05-20
Supplement: MOESM3 [file 41419_2024_6740_MOESM3_ESM.pdf]

Figure 1C

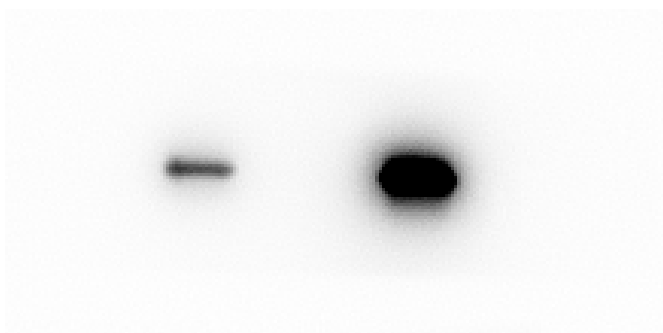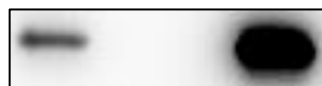

YY1 (IP:YY1)

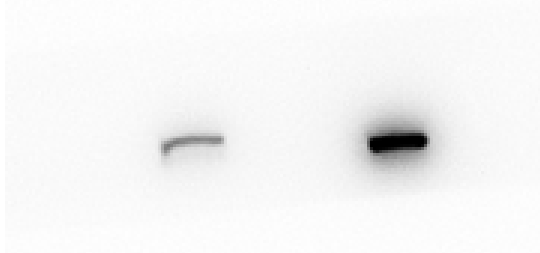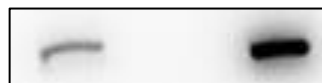

USP7 (IP:YY1)

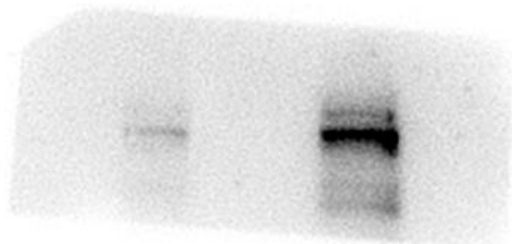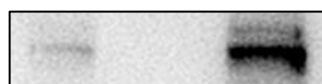

USP7 (IP:USP7)

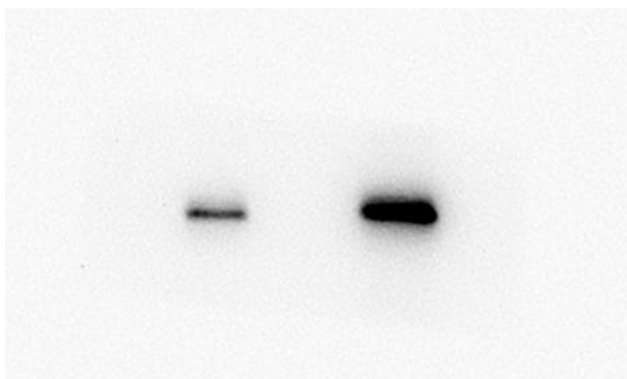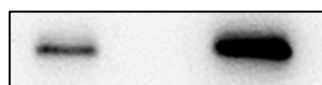

YY1 (IP: USP7)

Figure 1D

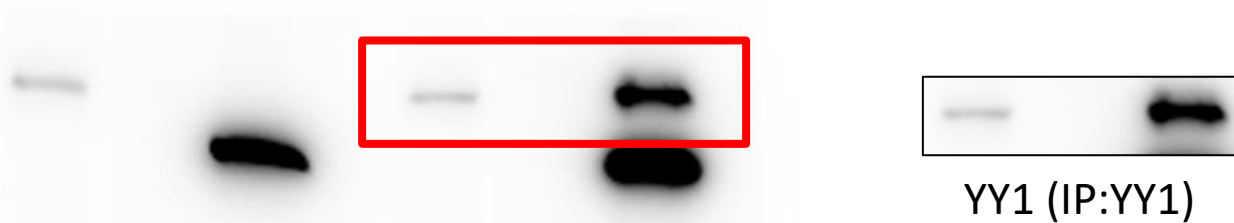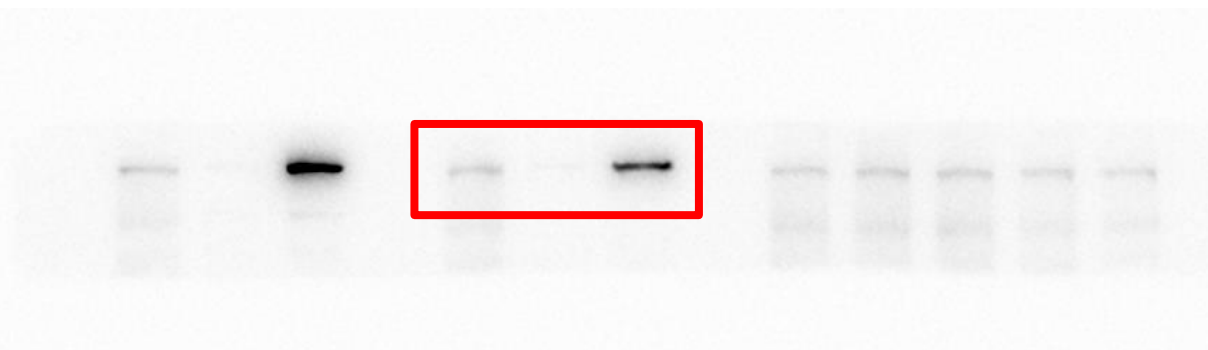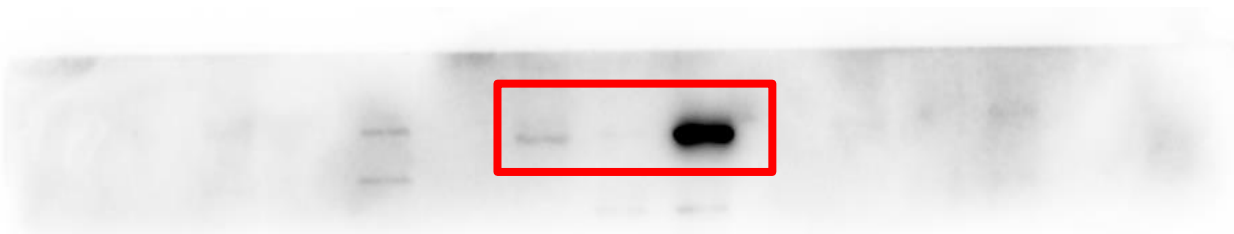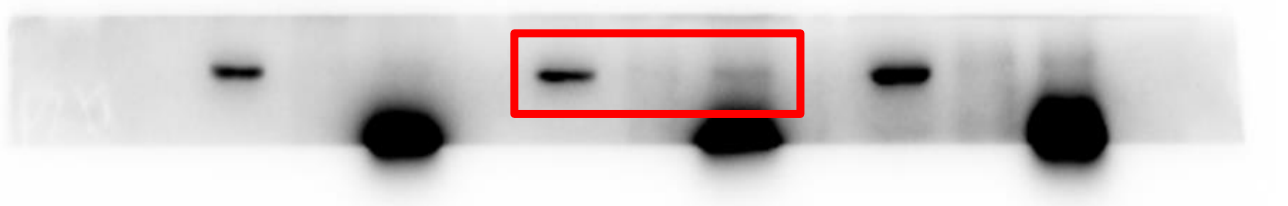

Figure 1E

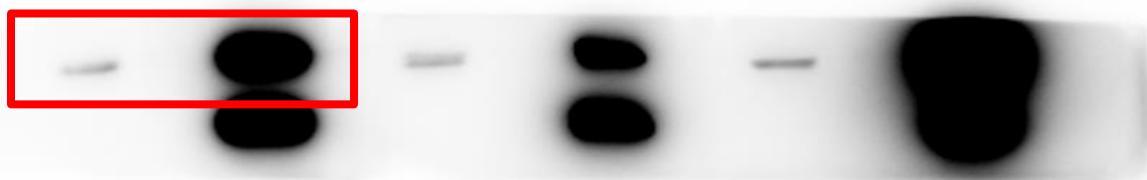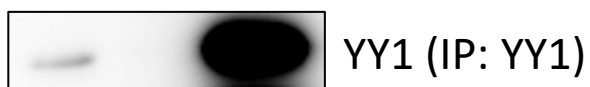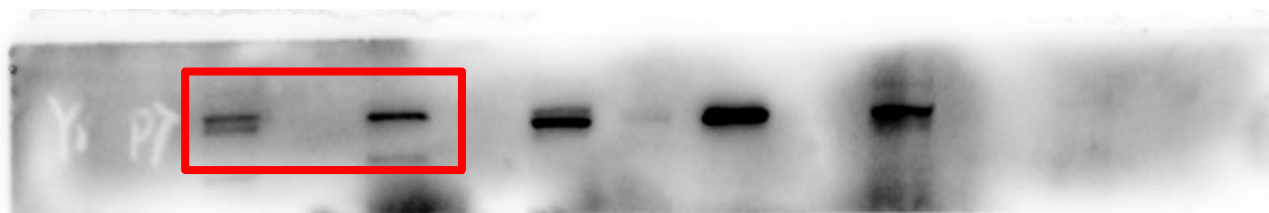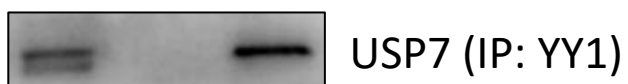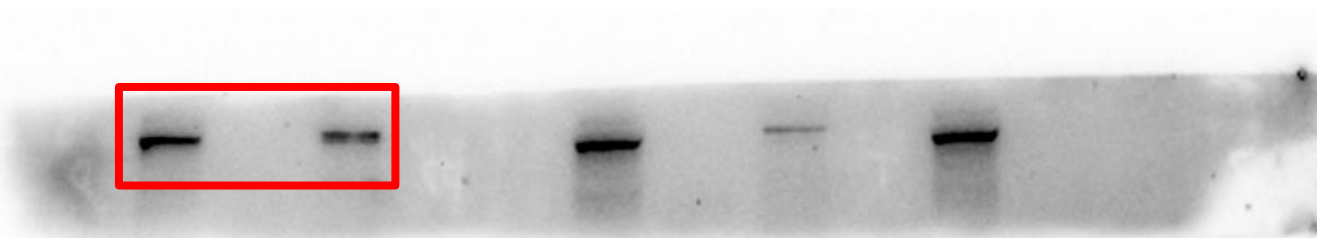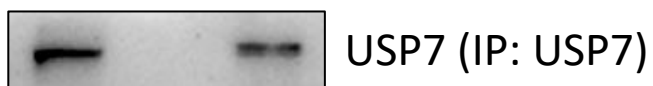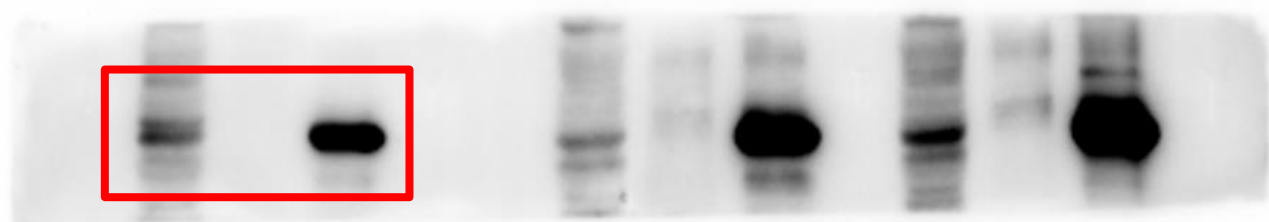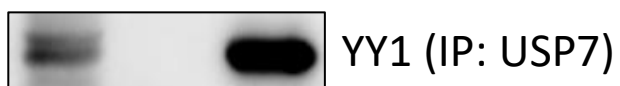

Figure 1F

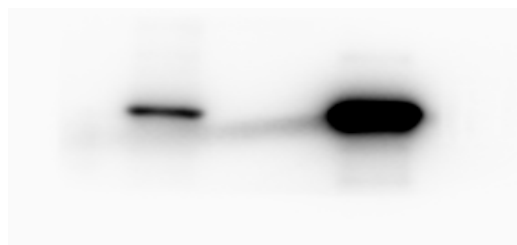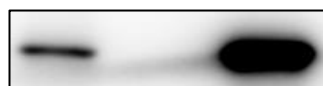

Flag (IP: Flag)

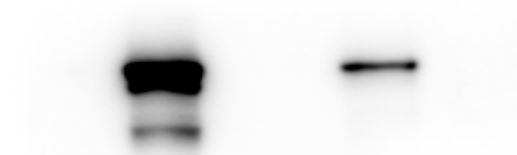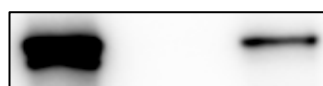

HA (IP: Flag)

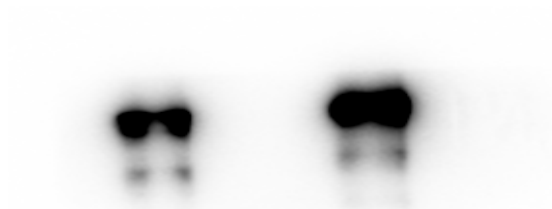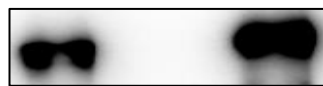

Flag (IP: HA)

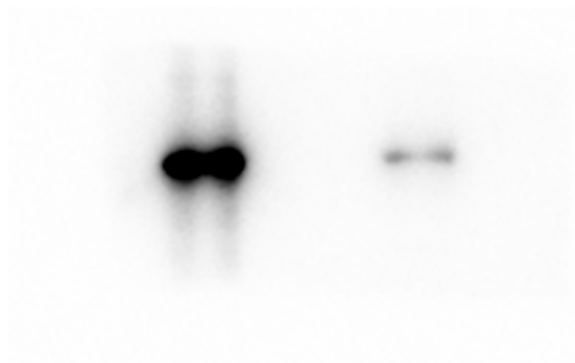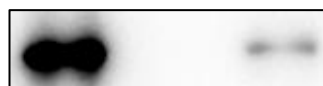

HA (IP: HA)

Figure 2A

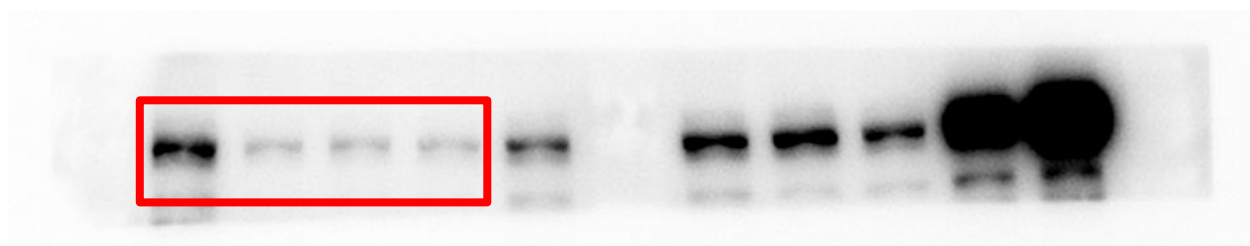

 USP7

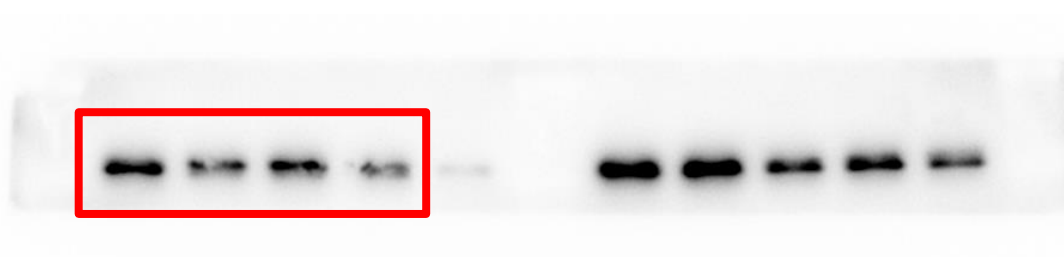

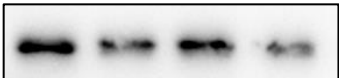 YY1

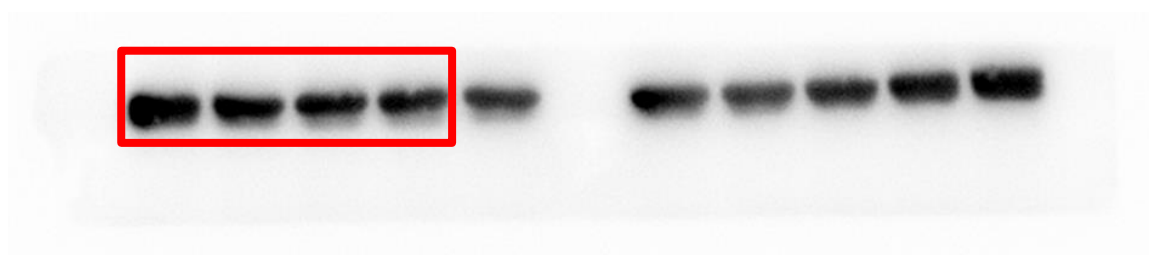

 GAPDH

Figure 2B

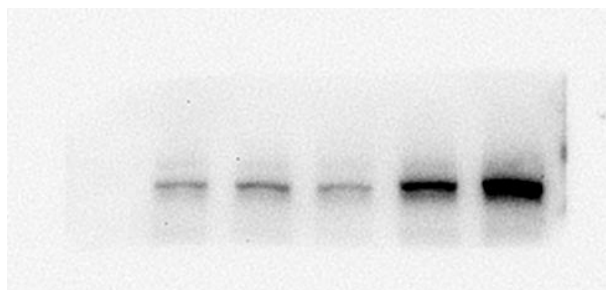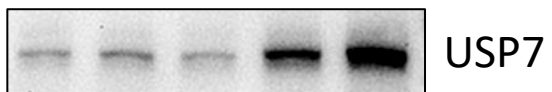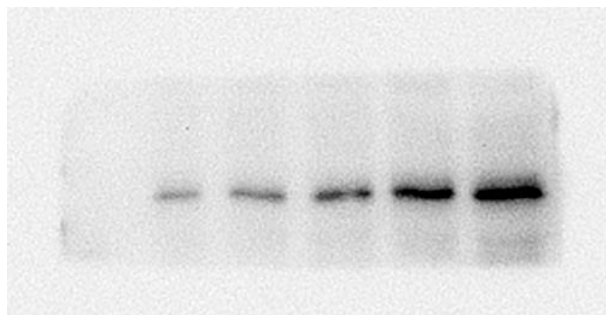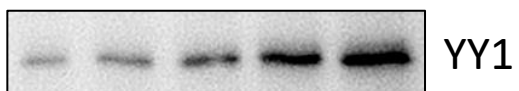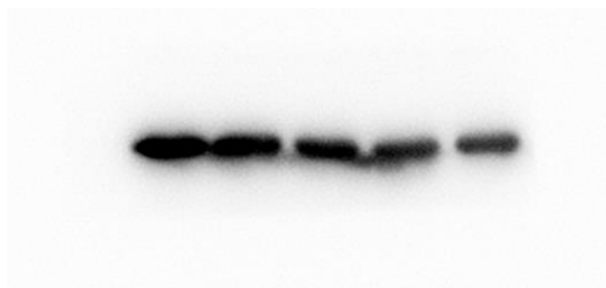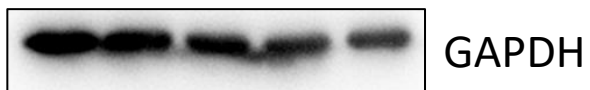

Figure 2D

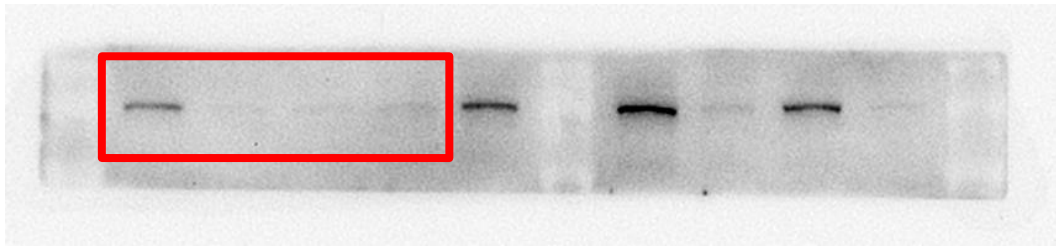

 USP7

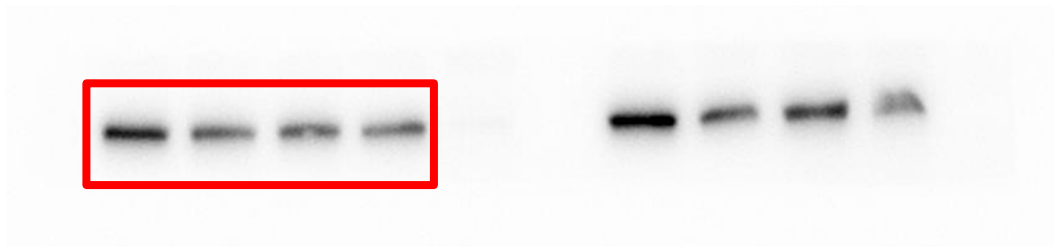

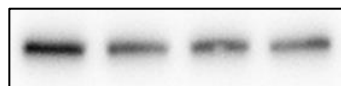 YY1

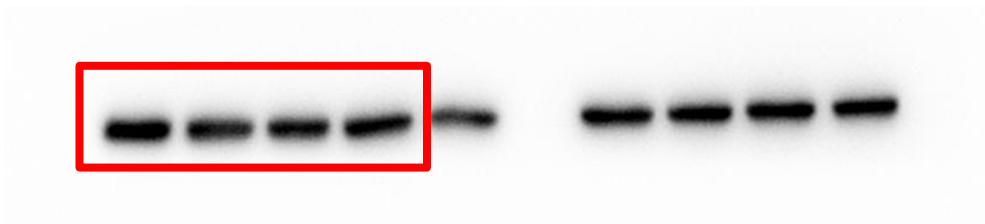

 GAPDH

Figure 2E

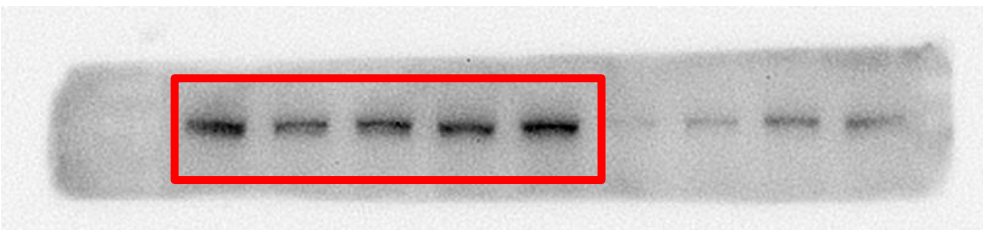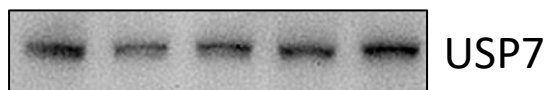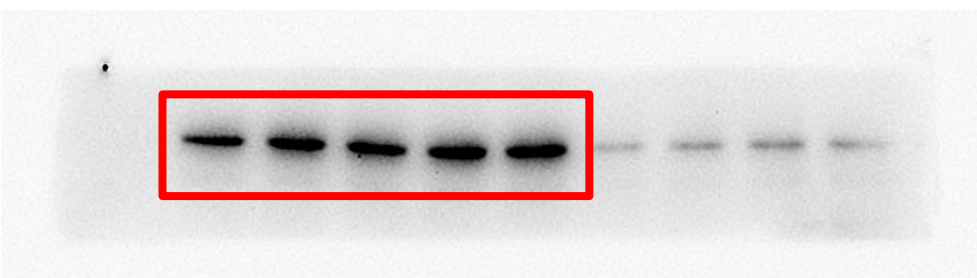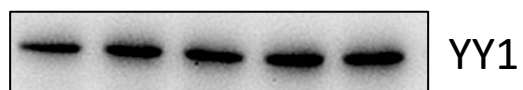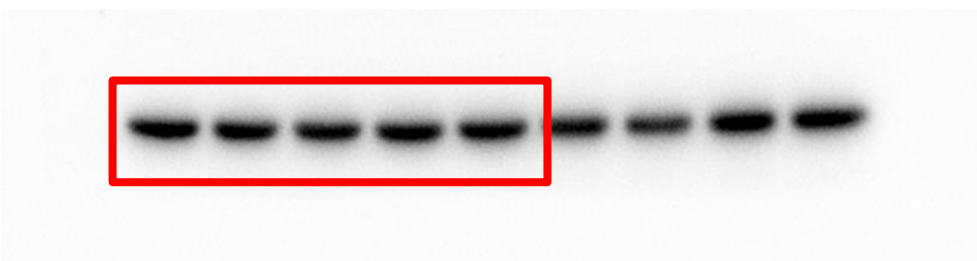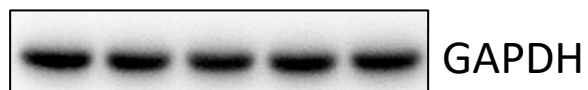

Figure 2G

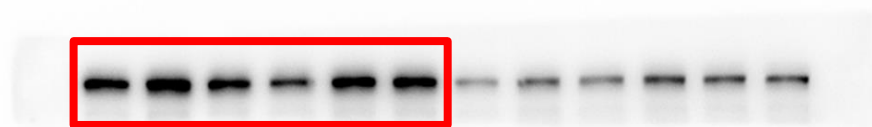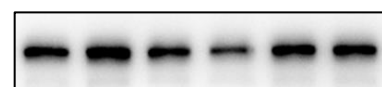

USP7 (siNC)

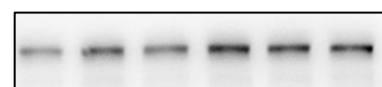

USP7 (siUSP7)

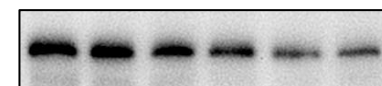

YY1 (siNC)

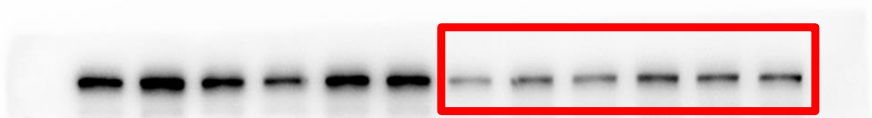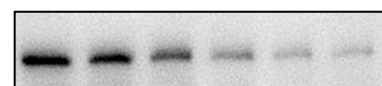

YY1 (siUSP7)

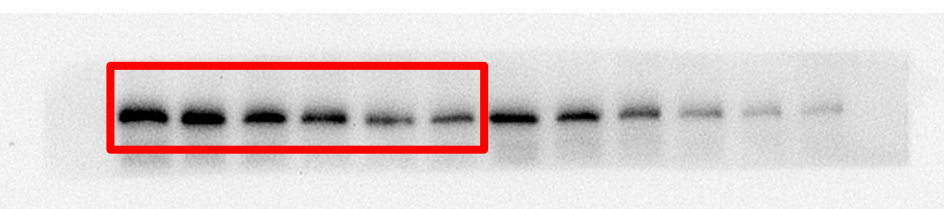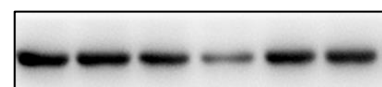

GAPDH (siNC)

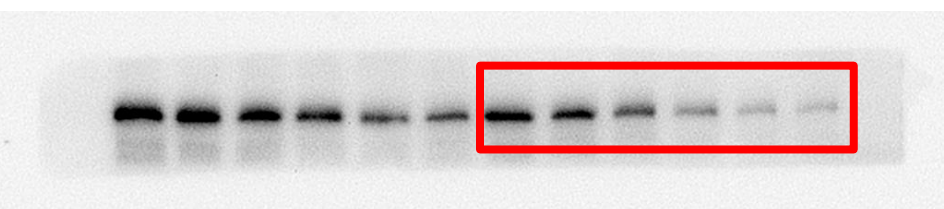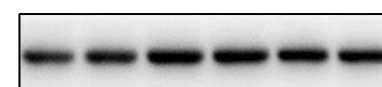

GAPDH (siUSP7)

Figure 2H

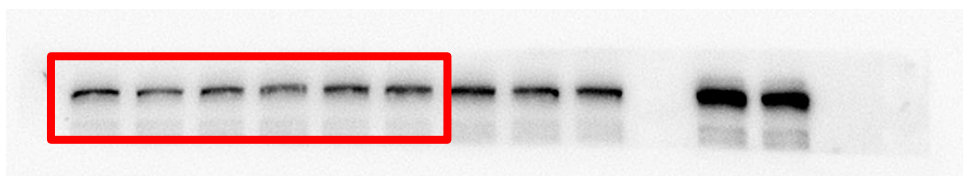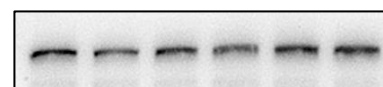

USP7 (siNC)

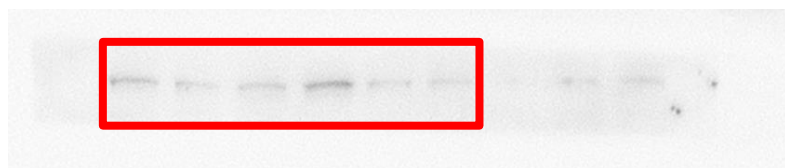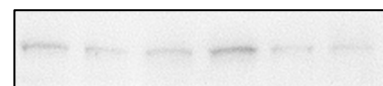

USP7 (siUSP7)

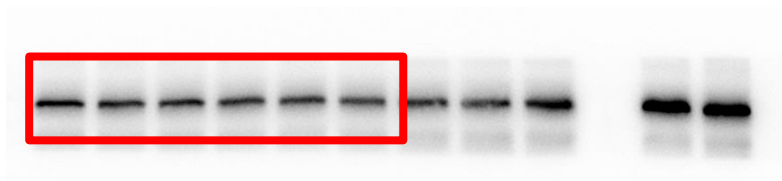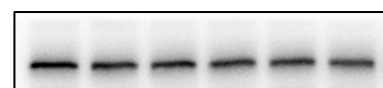

YY1 (siNC)

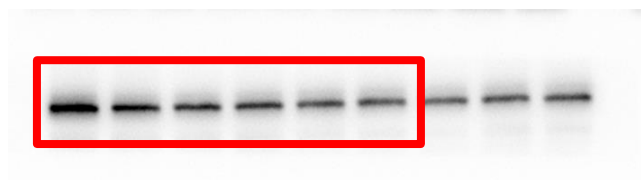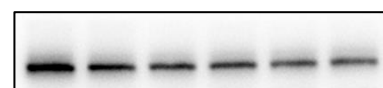

YY1 (siUSP7)

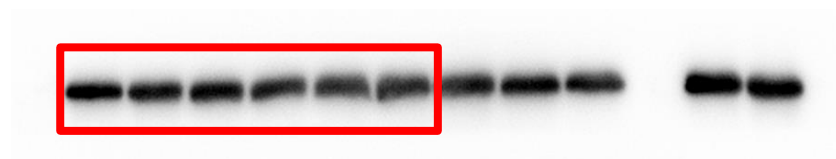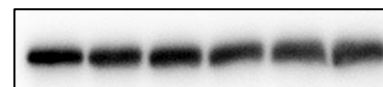

GAPDH (siNC)

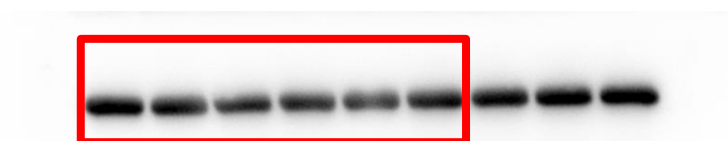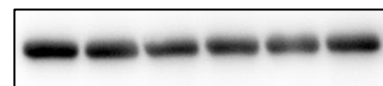

GAPDH (siUSP7)

Figure 2I

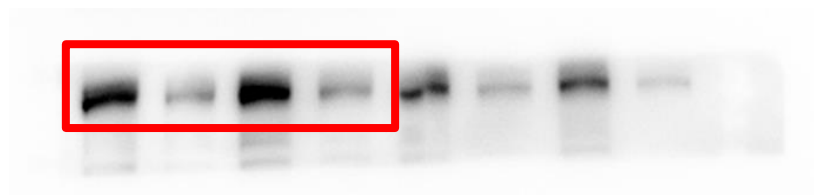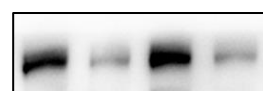

USP7

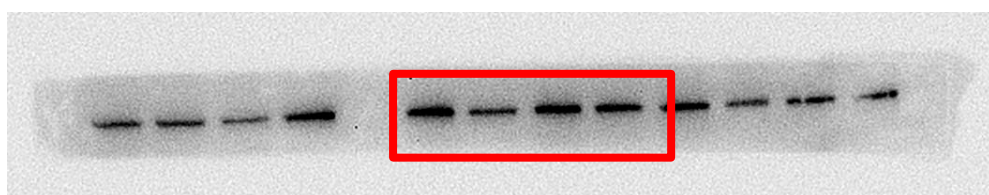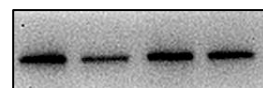

YY1

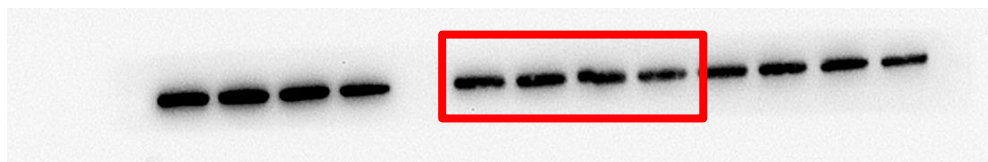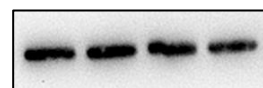

GAPDH

Figure 2J

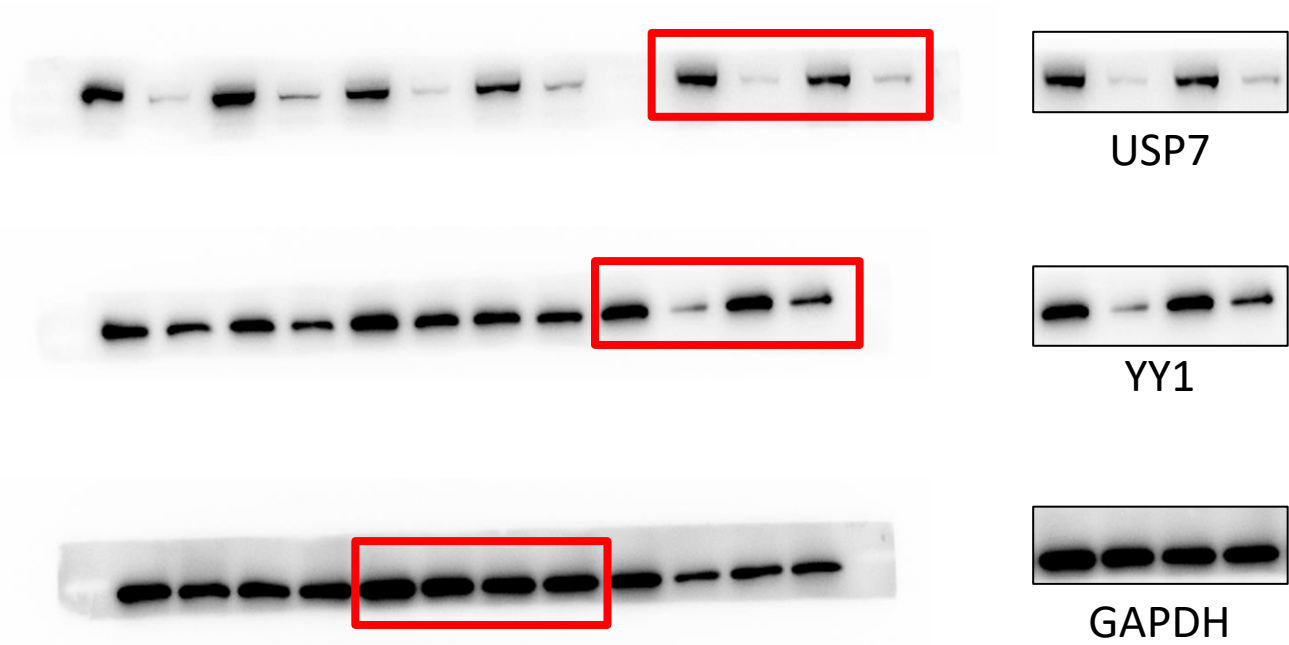

Figure 3A

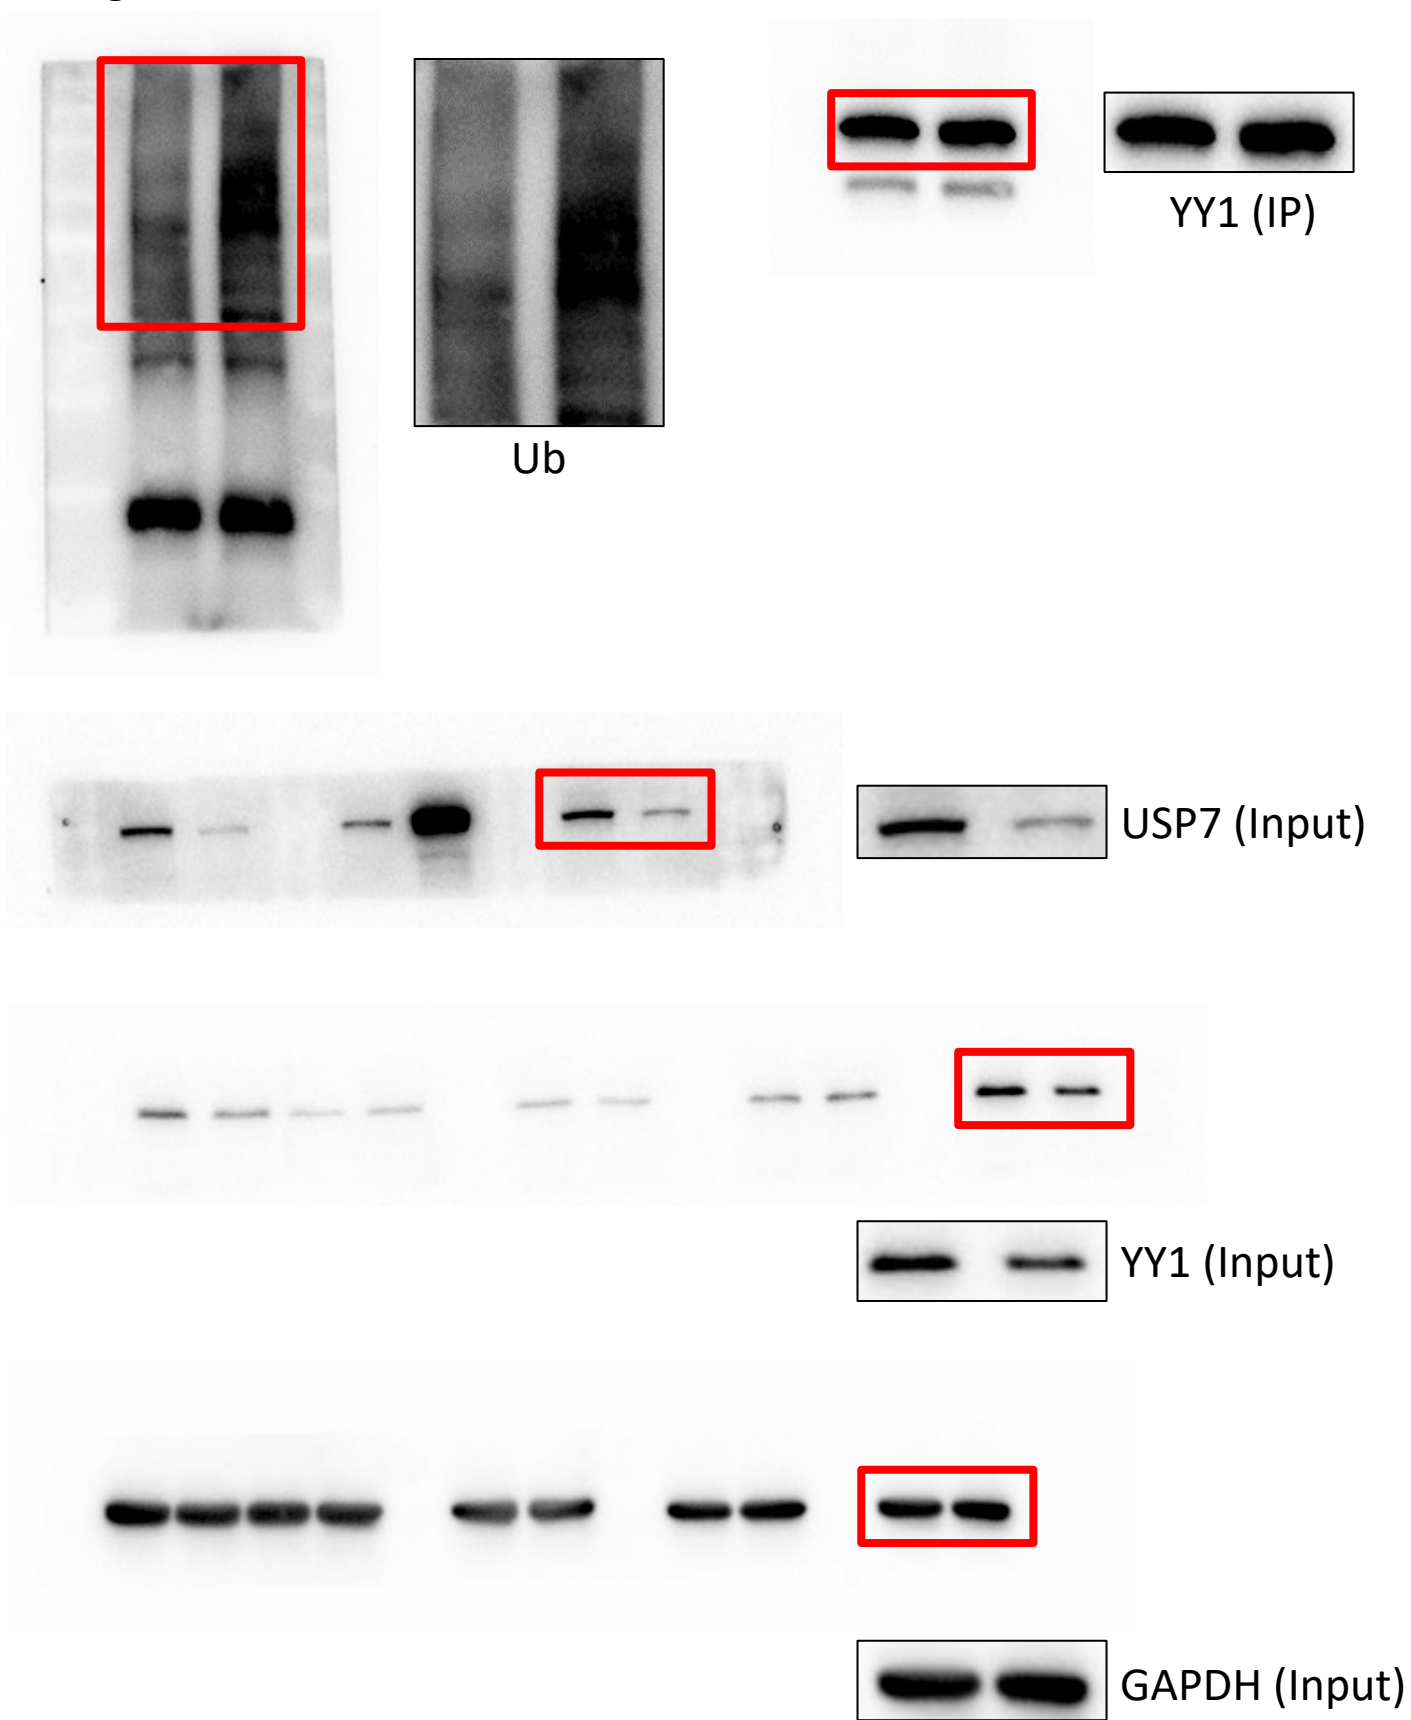

Figure 3B

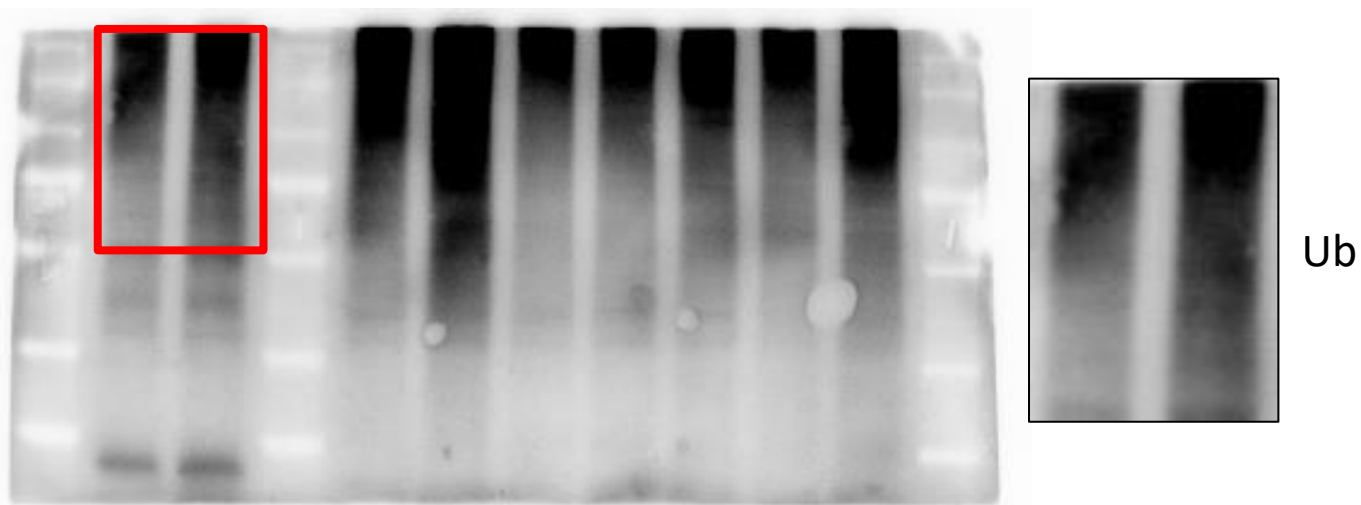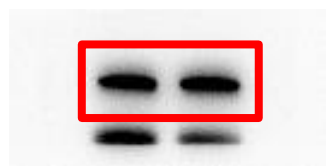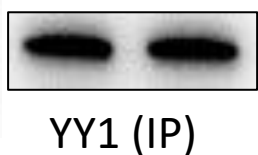

YY1 (IP)

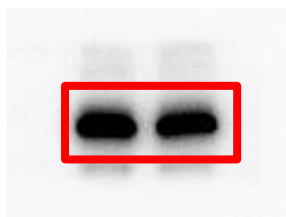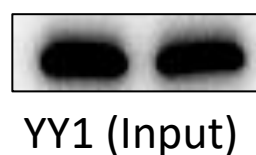

YY1 (Input)

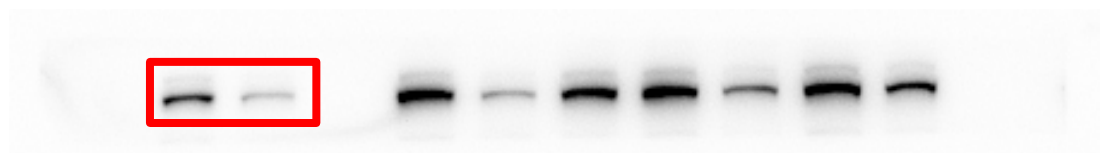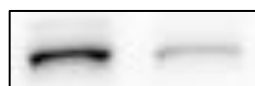

USP7 (Input)

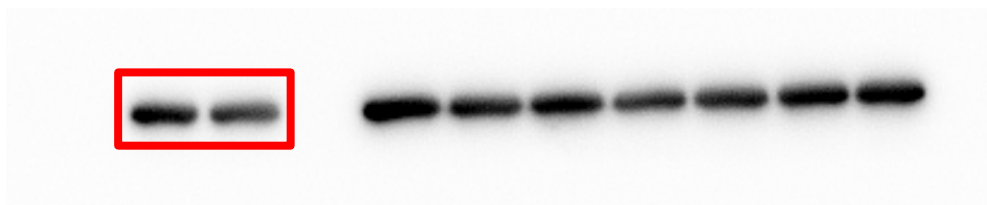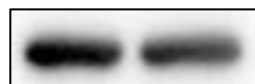

GAPDH (Input)

Figure 3C

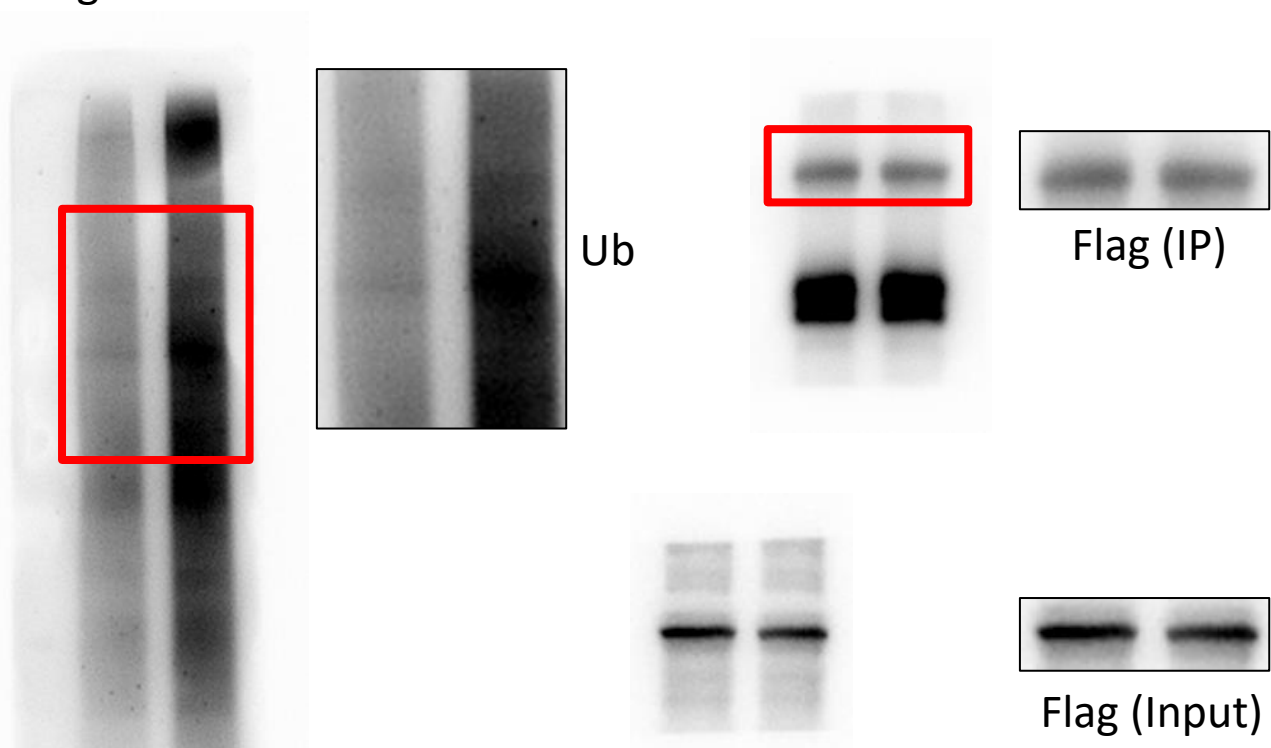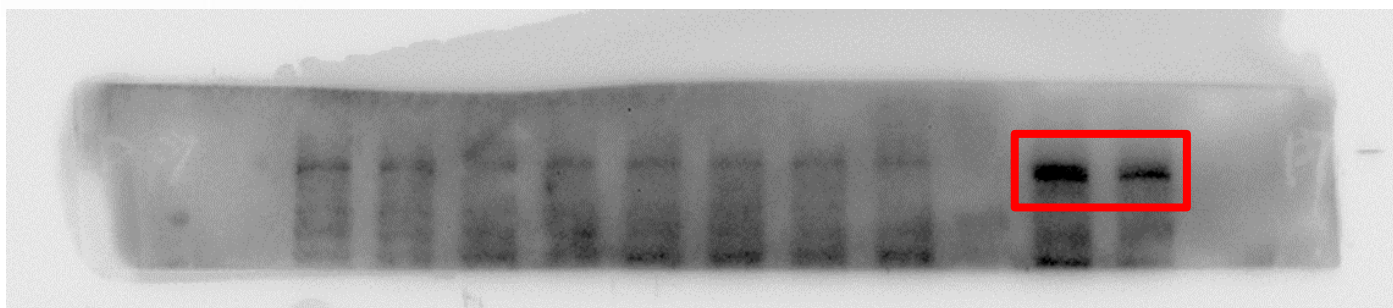

USP7 (Input)

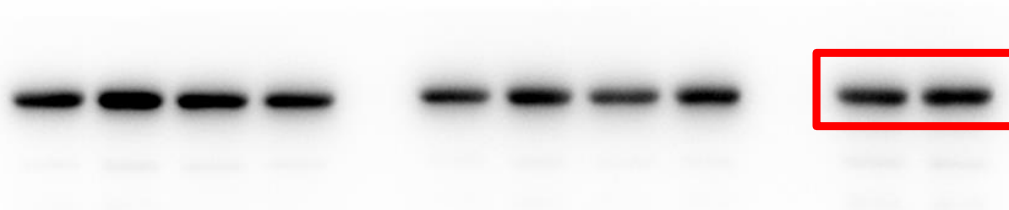

GAPDH (Input)

Figure 3D

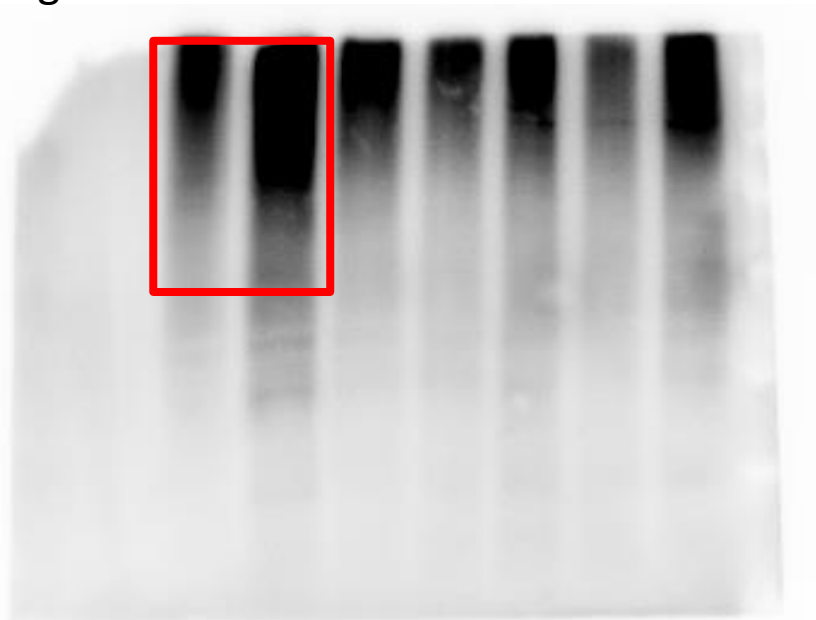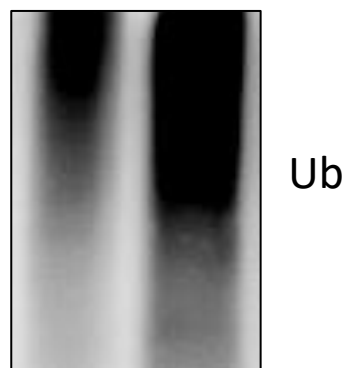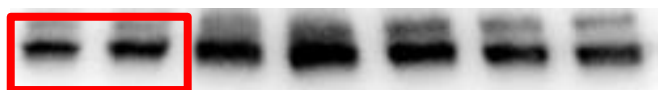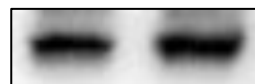

Flag (IP)

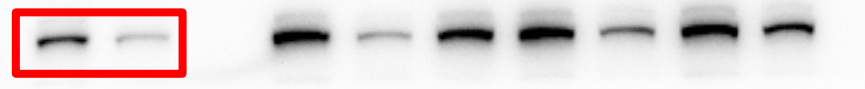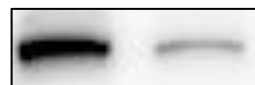

USP7 (Input)

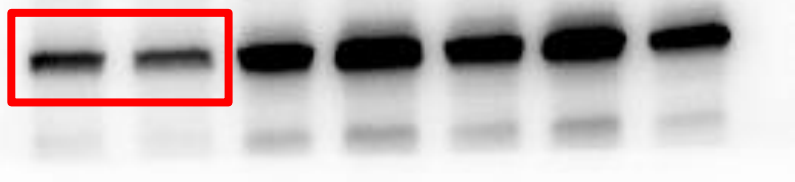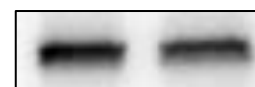

Flag (Input)

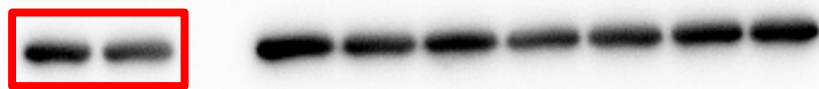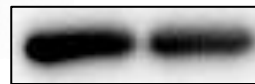

GAPDH (Input)

Figure 3E

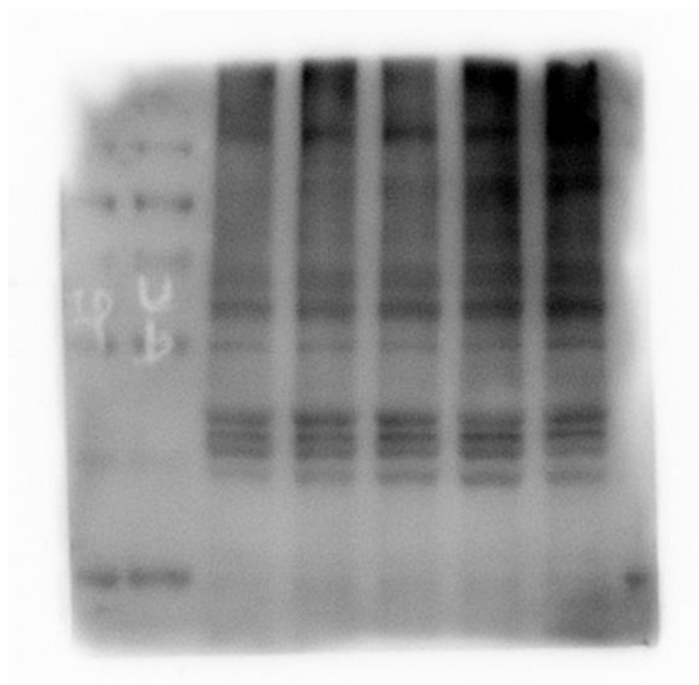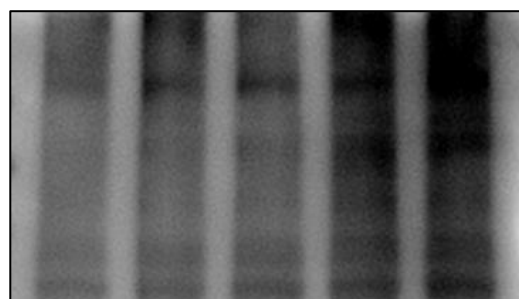

Ub

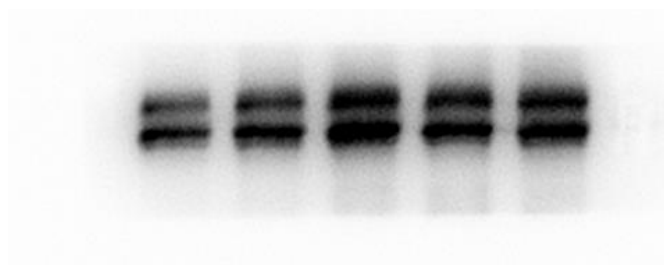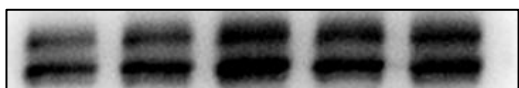

Flag (IP)

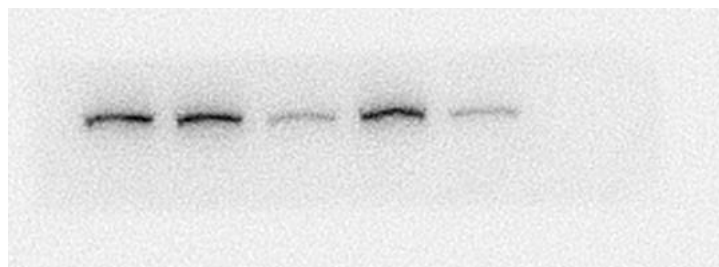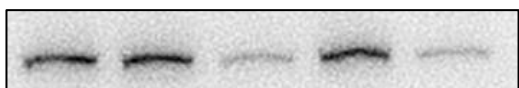

USP7 (Input)

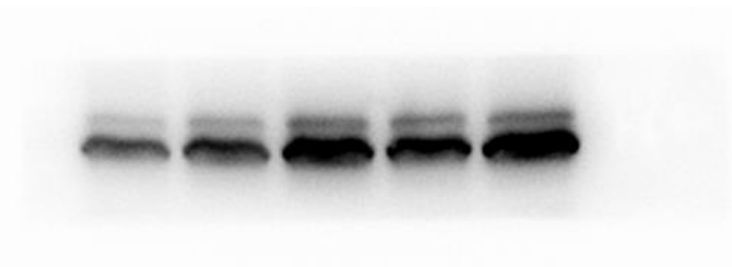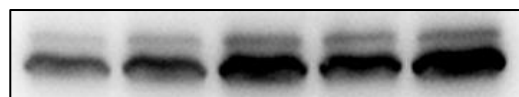

Flag (Input)

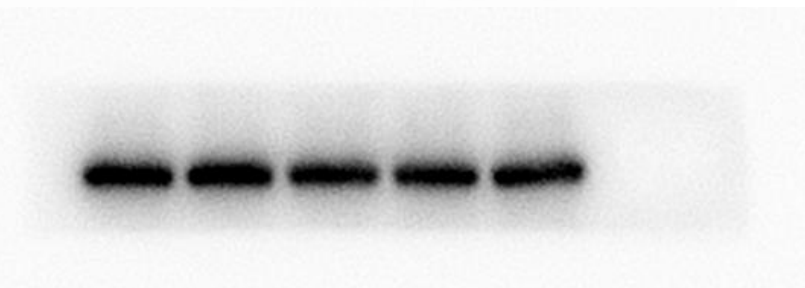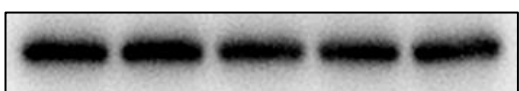

GAPDH (Input)

Figure 3F

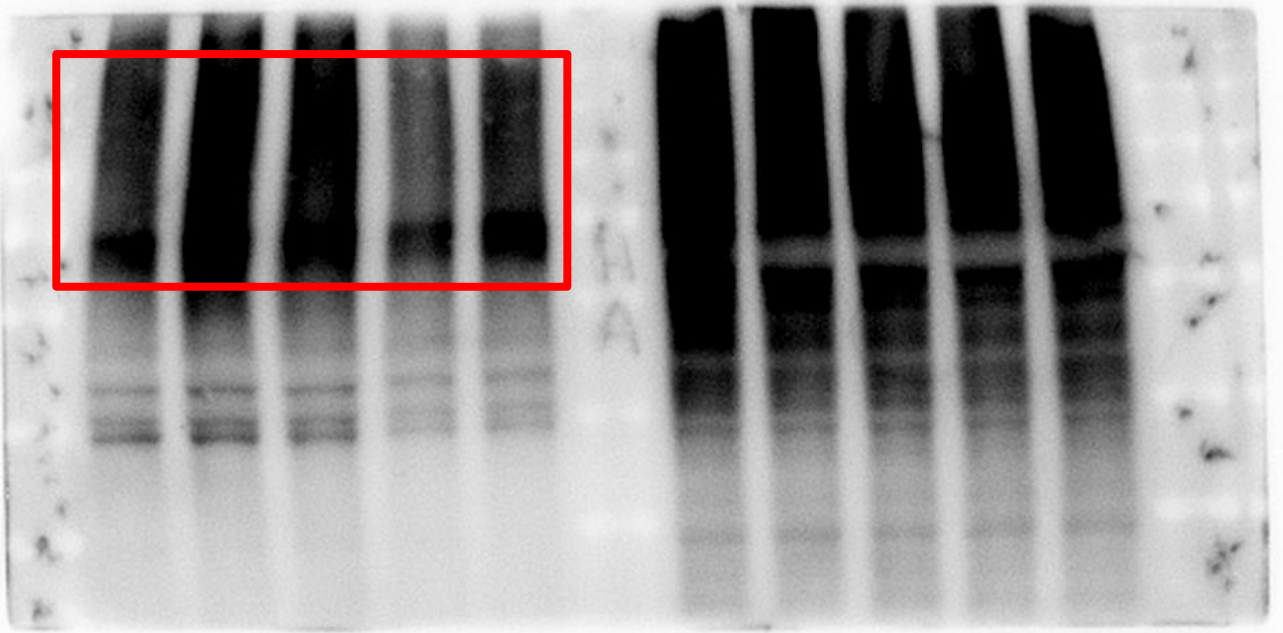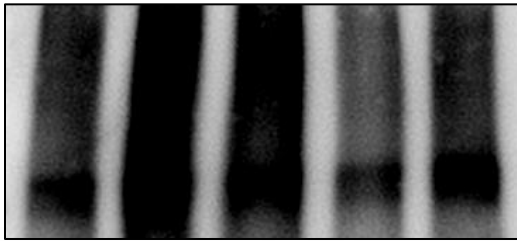

Ub

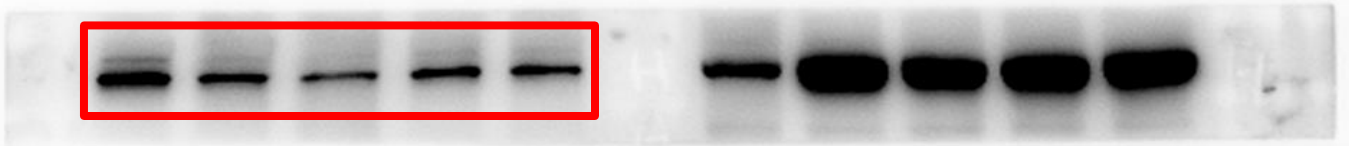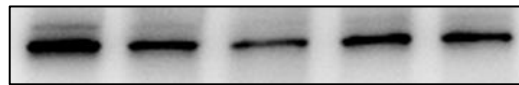

Flag (IP)

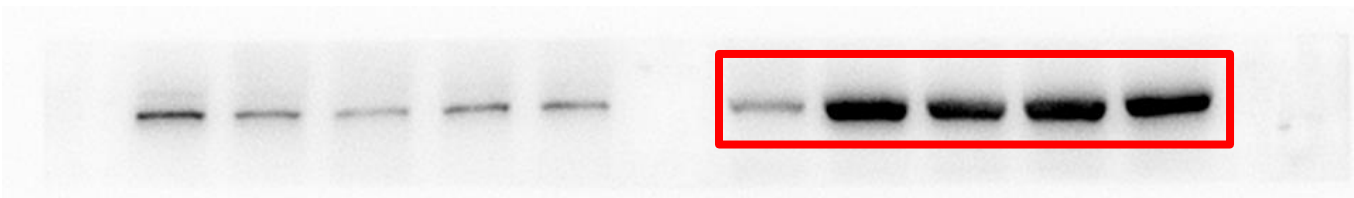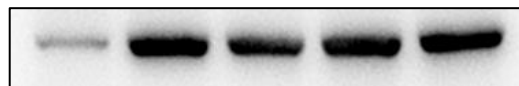

Flag (Input)

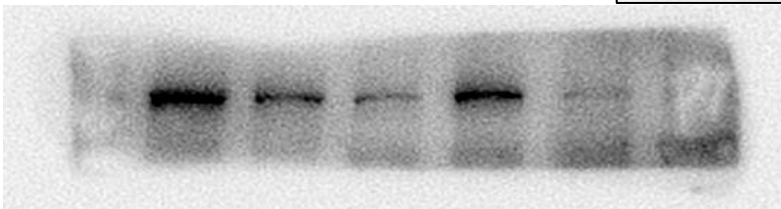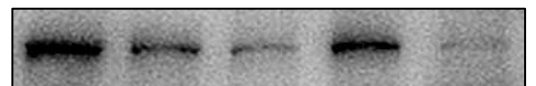

USP7 (Input)

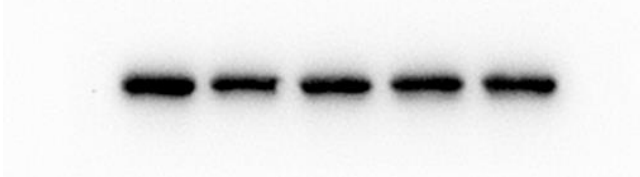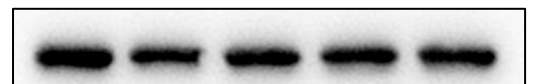

GAPDH (Input)

Figure 3G

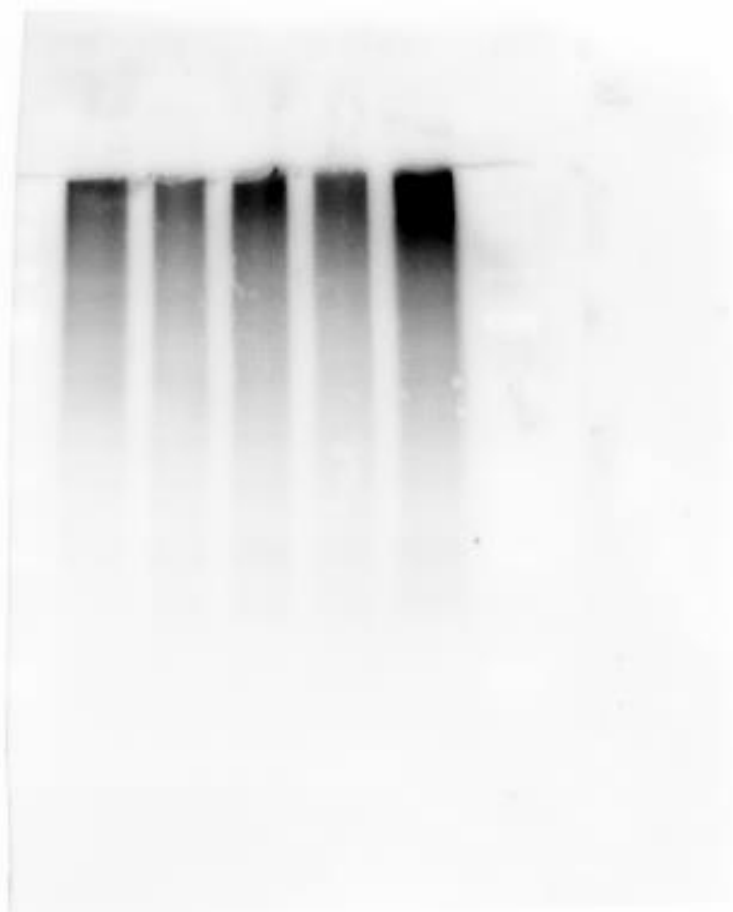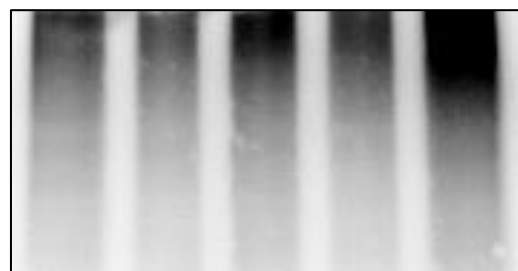

Ub

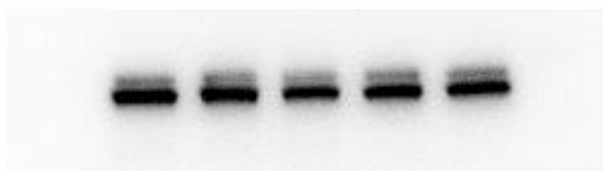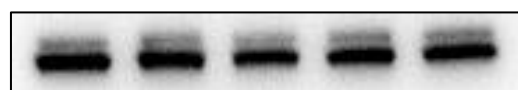

Flag (IP)

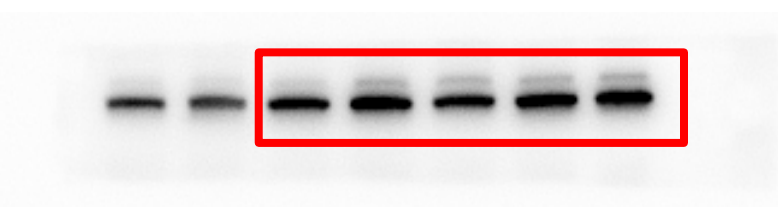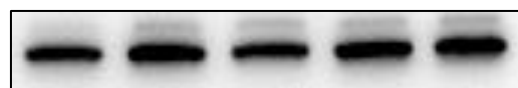

YY1 (Input)

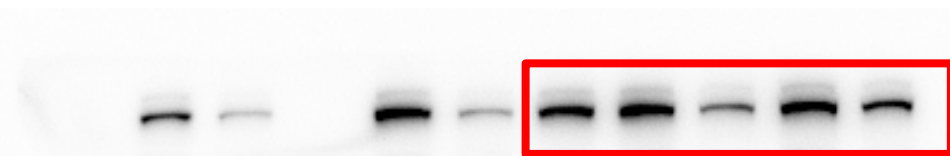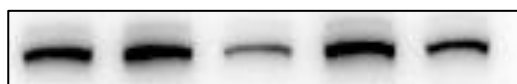

USP7 (Input)

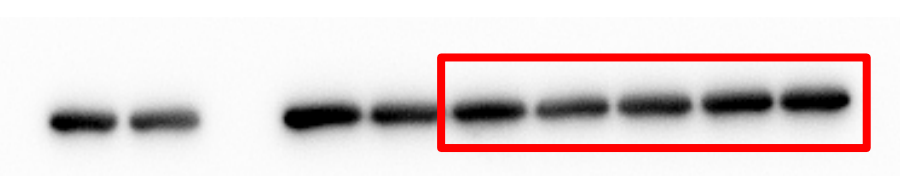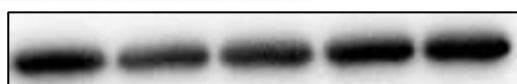

GAPDH (Input)

Figure 3H

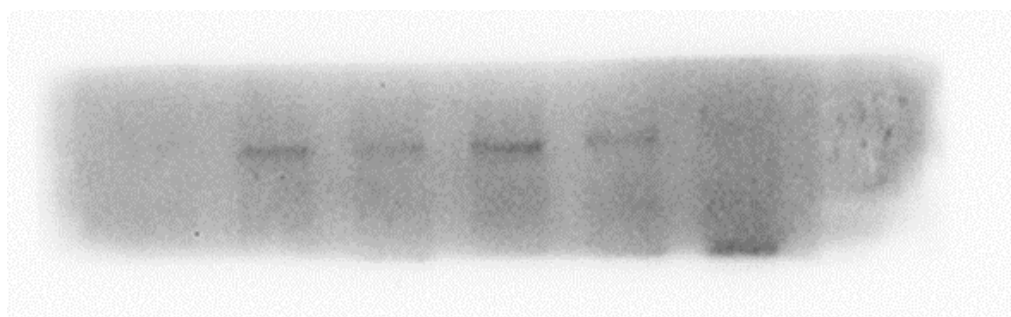

USP7

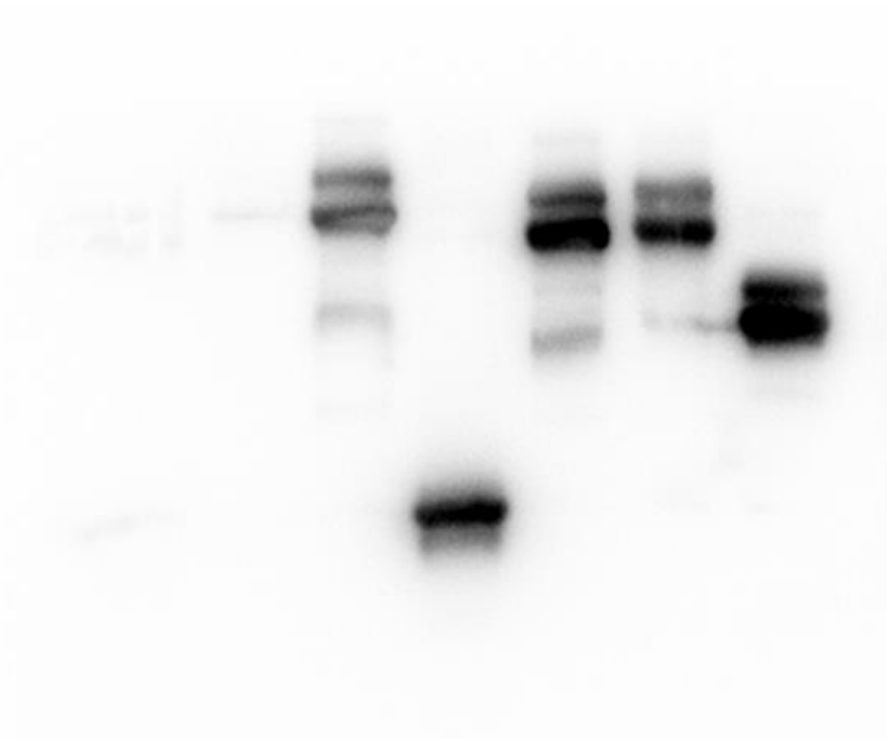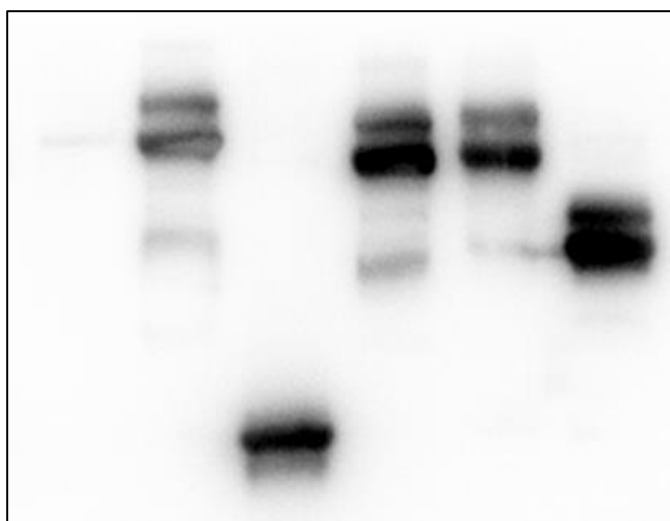

Flag (YY1)

Figure 4A

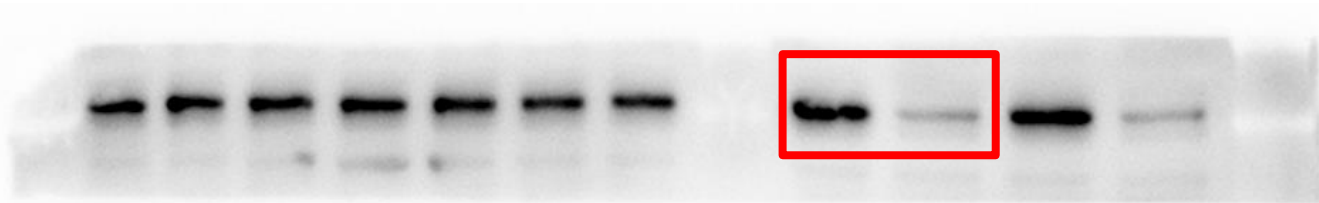

YY1

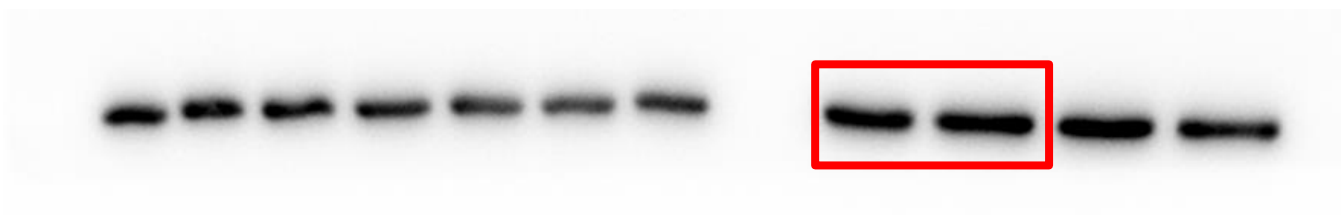

GAPDH

Figure 4H HCT116

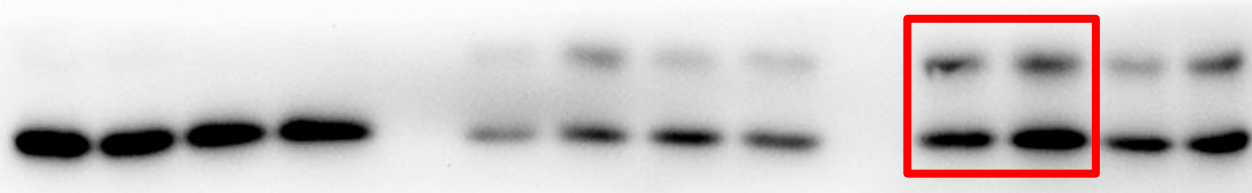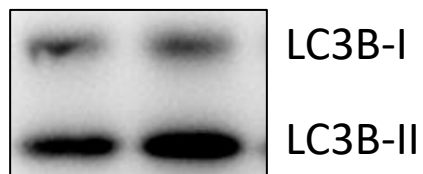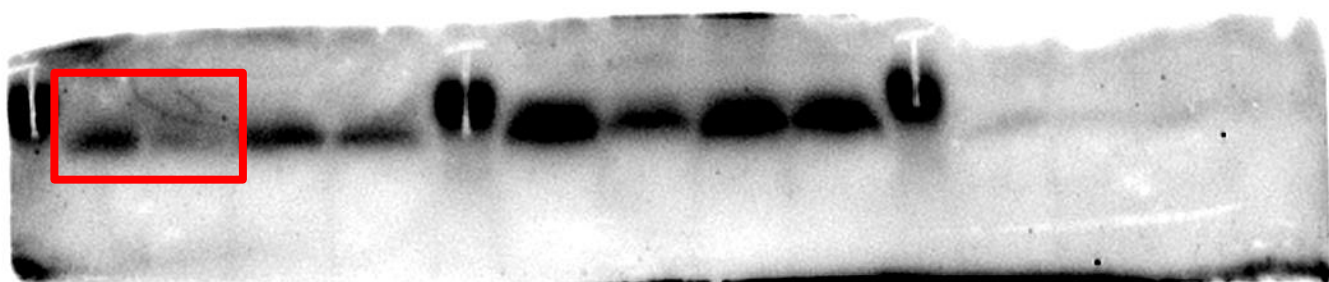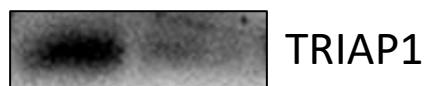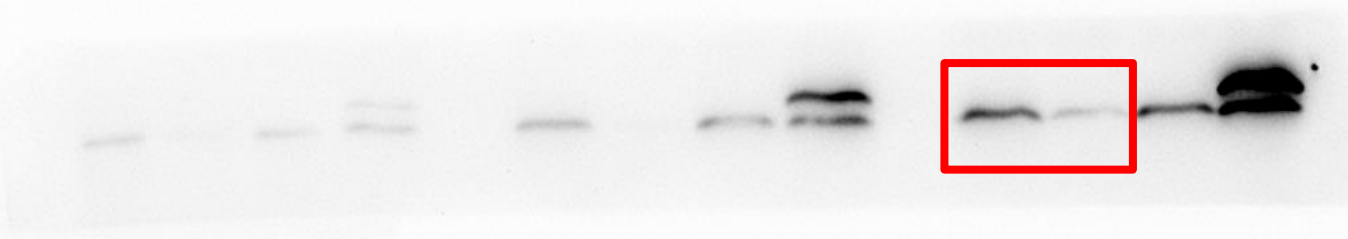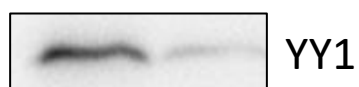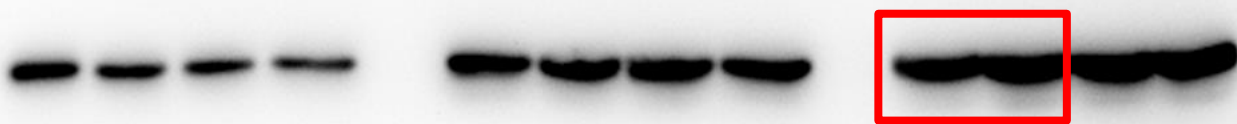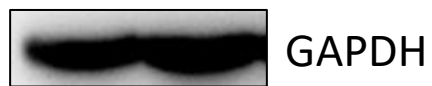

Figure 4H LOVO

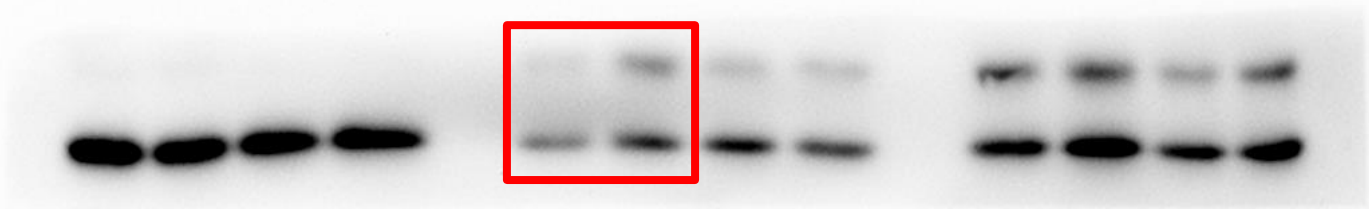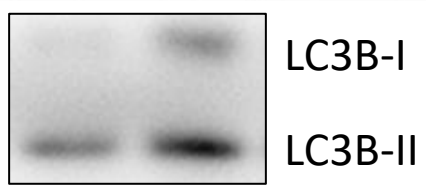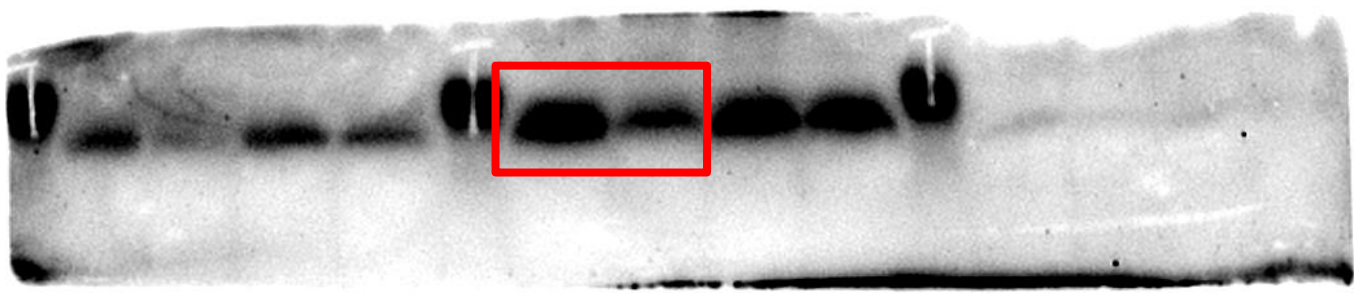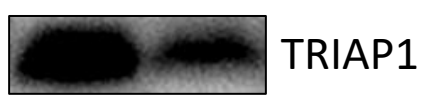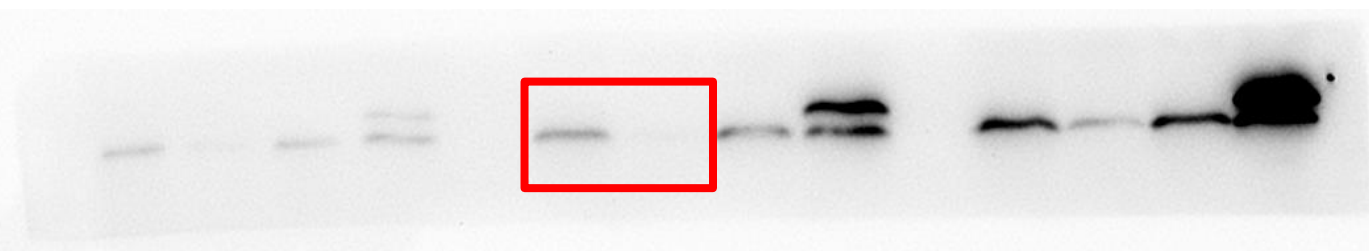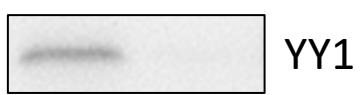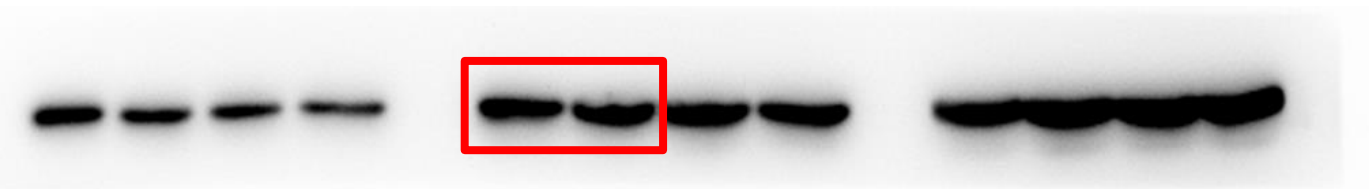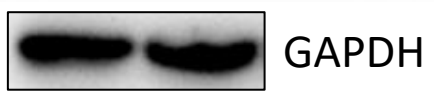

# Supplementary Figure 1A

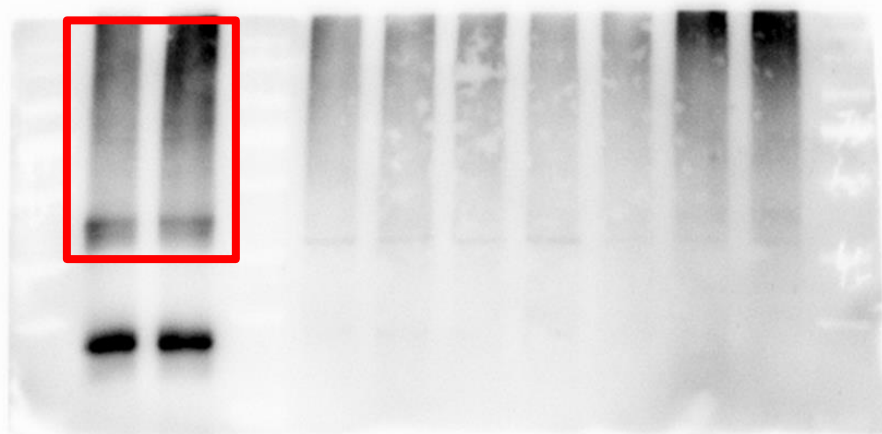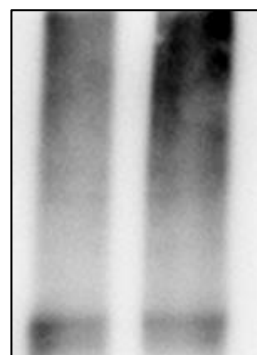

Ub

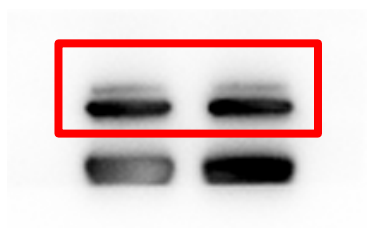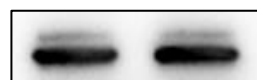

YY1 (IP)

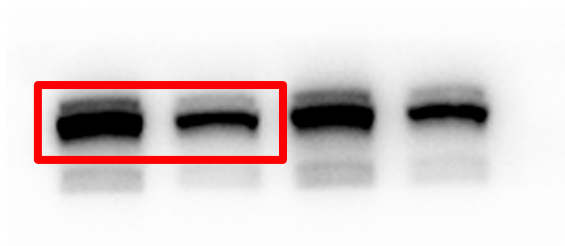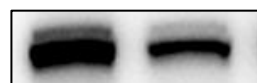

USP7 (Input)

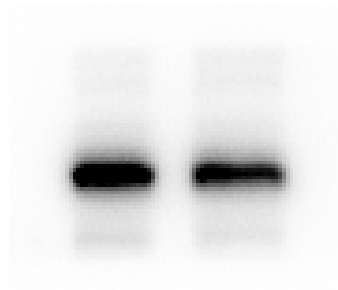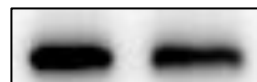

YY1 (Input)

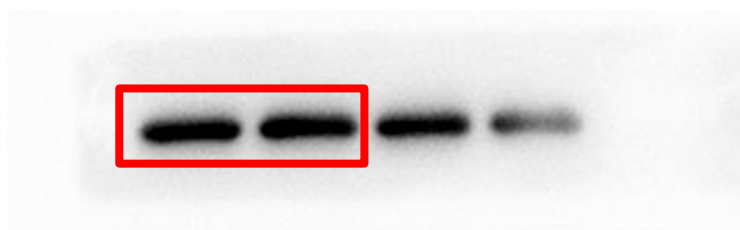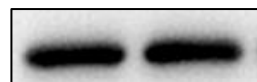

GAPDH (Input)

Supplementary Figure 1B

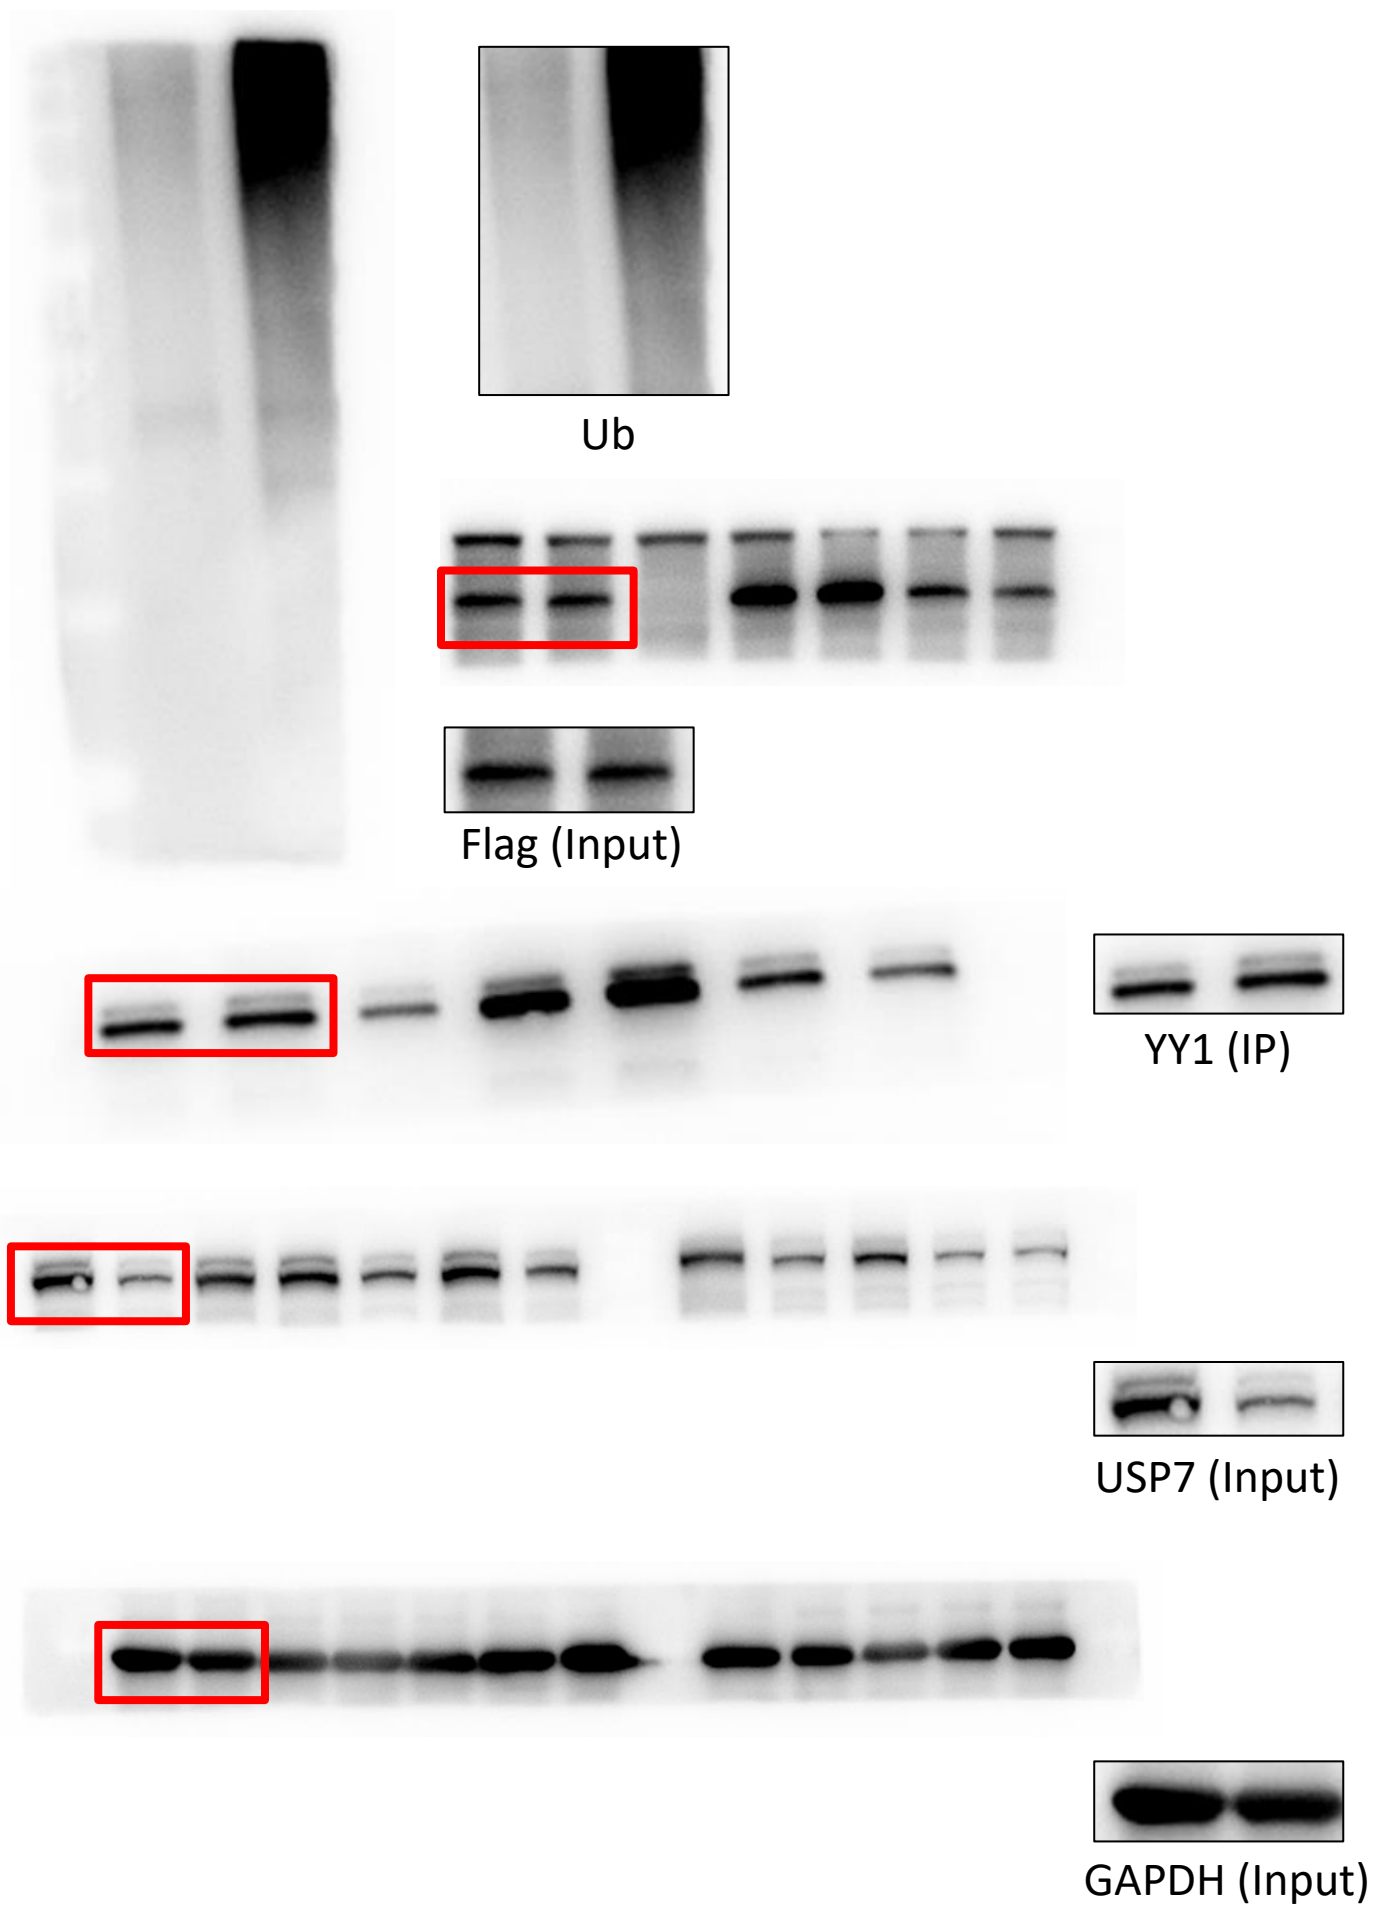

Supplementary Figure 1C

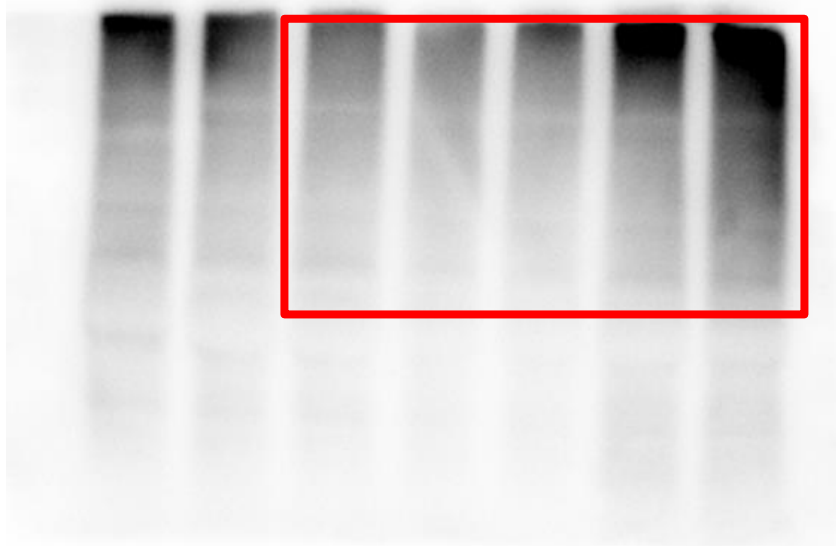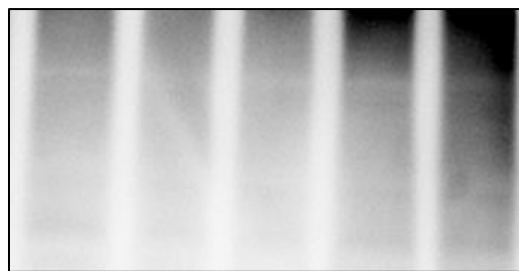

Ub

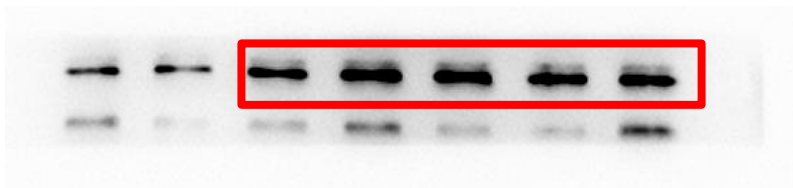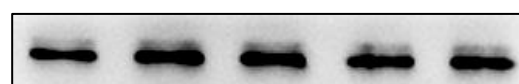

Flag (IP)

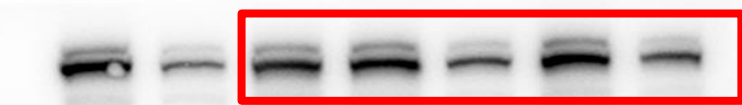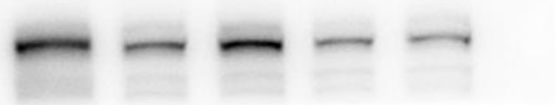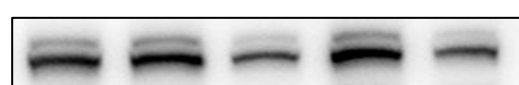

USP7 (Input)

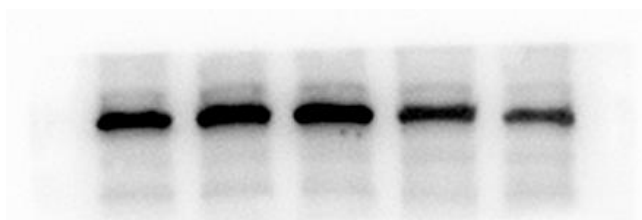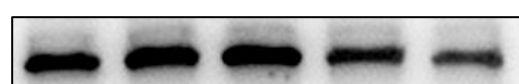

YY1 (Input)

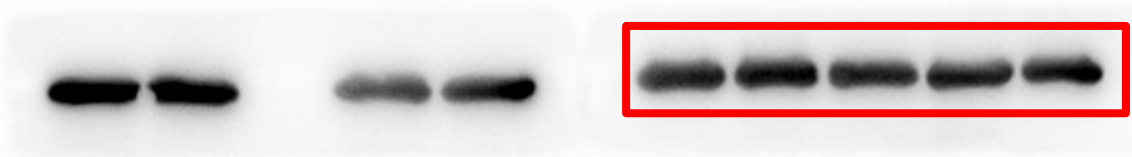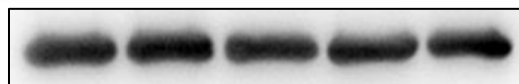

GAPDH (Input)
